# Supplementary material for: A new Antipathozoanthus species (Cnidaria, Hexacorallia, Zoantharia) from the northwest Pacific Ocean
Source: Zookeys. 2021 May 28;1040:49–64. doi: 10.3897/zookeys.1040.62309 (PMC8390791; doi:10.3897/zookeys.1040.62309)
Supplement: Supplementary material 1 — Table S1 [file zookeys-1040-049-s001.xlsx]

## Sheet: Sheet1
Table S1. GenBank accession numbers used for phylogenetic analyses in this study. Newly obtained sequences indicated in bold.
Taxa	Unique ID	18S	ITS-rDNA	28S	16S	12S	COI
Mesozoanthus fossii	MF 1	KC218409	EU591545		EF687822		EF672653
Mesozoanthus lilkweminensis	MISE 228		HM042386		HM042362		HM042382
Corallizoanthus aff. tsukaharai [NZ]	NZ 66		GQ464885	GQ464918	GQ464856	GQ464951
Corallizoanthus tsukaharai	OCACn20050613014	KC218410	EU035622		EU035623		EU035629
Kulamanamana haumeaae	SH3	KC218401			KC218432		KC218388
Zibrowius ammophilus	SH15	KC218408			KC218439		KC218395
Zibrowius primnoidus	SS-2014a 3242				KJ459374	KJ459381	KJ459364
Hurlizoanthus parrishi	SH7	KC218402			KC218433		KC218389
Hurlizoanthus hirondelleae	SS-2014 4098				KJ459379	KJ459388	KJ459371
Kauluzoanthus kerbyi	SH12	KC218404			KC218435		KC218391
Bullagummizoanthus emilyacadiaarum	2582AB	KC218403			KC218434		KC218390
Savalia lucifica	FS815	KC218398	EU591550		EF687819		EF672658
Savalia savaglia	SAV 1 (=FS94)	HM044299	EU591548	HM044298	AY995925	AY995905	AB247356
Parazoanthid sp. [EBISCO]	EBISCO		EU591561		EU591601		EU591617
Parazoanthid sp. [CORSARO]	CORSARO (=FS368)	KC218412	EU591559		EF687824		EF672665
Parazoanthid sp. [NC2]	FS324	KC218413	EU591562		EU591600		EU591615
Parazoanthid sp. [NC3]			EU591558		EU591602		EU591616
Antipathozoanthus macaronesicus [CV]	CV (=FS 107)	KC218411	EU363365		AY995931	AY995907	AB247357
Antipathozoanthus hickmani	CMNH-ZG 05883	MW652771	MW652764		MW652769	MW652759
Antipathozoanthus hickmani	03-549		EU333798		EU333756		EU333783
Antipathozoanthus tubus	S2	MW652773	MW652765	MW652768	MW652770	MW652761	MW649812
Antipathozoanthus sp. [M2]	MAD 2		EU591554		EU591599		EU591619
Antipathozoanthus cavernus	NSMT-Co1604		MG384699	MW652766	MG384681	MW652763	MG384660
Antipathozoanthus remengesaui	NSMT-Co1603	MW652772	MG384703	MW652772	MG384673	MW652762	MG384649
Antipathozoanthus obscurus	NSMT-Co1602	MW652774	MG384691		MG384685	MW652760	MG384644
Bergia cutressi	TOB 44		EU418267	GQ464917	EU828759	GQ464950
Bergia puertoricense	NAV 58/FS211	KC218418	EU418312	GQ464915	EU828758	GQ464948	AB247351
Bergia catenularis	TOB 37		EU418292	GQ464916	EU828757	GQ464949
Umimayanthus nakama	NIP 155 (=ParaKY1)		GQ464884	GQ464913	GQ464855		AB247352
Umimayanthus miyabi	NC Shal (=FS383)	KC218419	EU591568		EU591607	GQ464946	EU591626
Umimayanthus parasiticus	TOB 47		EU418306	GQ464914	EU828756	GQ464947	EF672663
Umimayanthus chanpuru	NC Deep 2 (=FS393)	KC218420	EU591580		EU591609		EU591624
Parazoanthus juan-fernandezii	CHI 187		GQ464879	GQ464906	GQ464850	GQ464939
Parazoanthus axinellae	SPA M1/FS99	KC218416	EU418283	GQ464907	EU828754	GQ464940	AB247355
Parazoanthus anguicomus	IRE 266		GQ464880	GQ464908	GQ464851	GQ464941	EF672660
Parazoanthus capensis	SA 262		GQ464881	GQ464909	GQ464852	GQ464942
Parazoanthus swiftii	PAN 9/FS197	KC218417	EU418332	GQ464912	EU828755	GQ464945	AB247350
Parazoanthus darwini	GAL 2 (=03-47)		EU333801		EU333749		EU333778
Epizoanthus illoricatus		KC218424	EU591541	KJ483036	AY995929	AY995901	AB247349
Epizoanthus arenaceus		KC218428	EU591538		AY995926	AY995903	AB247348
